# Supplementary material
Source: publisher figshare collection journal article supplement (https://gsajournals.figshare.com/articles/dataset/_/12357731)

# This *Notebook* can be used to restore the results of figure

***“Dependence of the optimal plasmid copy number on the antibiotic concentration.”*** (Panel C, E, F)

## Clear Mathematica environment

```
In[1582]:= ClearAll["Global`*"]

(*Skipped Antibiotic Concentrations. *)
skippedAB = 1; (*Use 4 for testing (~10s)
and use 1 to obtain results from paper (~5min) *)
```

## Set parameters

```
In[1584]:= (*Set N0*u*)
N0u=.2;
(*Set death rate (constant)*)
 $\mu$ =1.;
(*Set parameters for fitness curve*)
{Smax,Smin,cMIC, $\kappa$ }={.5,-.2,1.,8.};
(*Set parameters for function of available enzymes*)
{ $\eta$ , $\omega$ }={1.3,0.2};
(*Set parameter for diffusion coefficient*)
 $\gamma$ =1.;
(*Set parameter for plasmid cost*)
c=0.01;
(*Set range of plasmid copy numbers n*)
nRange={1,2,5,10};
(*Set range of antibiotic concentrations outside the cell*)
coutRange=Range[cMIC,2.4,.02][[1;;-1;;skippedAB]];
```

## Define parameters and functions for "degradation types", etc.

```
In[1592]:= (*Define function for the fitness S*)
S[cin_]:=Smax-((Smax-Smin)(cin/cMIC)^ $\kappa$ )/((cin/cMIC)^ $\kappa$ -Smin/Smax);

(*Define function for the amount of available enzymes*)
f[i_,n_,type_]:=

$$\begin{cases} \eta*i/n & \text{StringContainsQ[type,"Relative"]} \\ \omega*i & \text{StringContainsQ[type,"Absolute"]} \\ \text{Null} & \text{True} \end{cases}$$

(*Define function for the internal concentration*)
cin[cout_,i_,n_,type_]:=cout/(f[i,n,type]/ $\gamma$ +1.);
```

```

In[1595]:= (*Helper function returning the birth rate for a given fitness*)
λ1[S_]=μ+S;

(*Helper function for death rate if necessary including costs*)
μ1[n_,type_]:=

$$\begin{cases} \mu+c*n & \text{StringContainsQ[type,"Cost"]} \\ \mu & \text{True} \end{cases}$$


(*Helper function returning the birth probability for a given birth rate*)
p1[λ_,μ_]:=λ/(λ+μ);

In[1598]:= (*Functions for birth rate, death rate and birth probability respectively*)
λ[n_,type_,cout_]:=Function[i,λ1[S[cin[cout,i,n,type]]]]
p[n_,type_,cout_]:=Function[i,p1[λ1[S[cin[cout,i,n,type]]],μ1[n,type]]]

```

## Define functions for calculation of establishment and rescue probability

In[1600]:=

```
(*)
(*Define a module to calculate the establishment probability
from the fixed point of the probability generating function
given the plasmid copy number n and the function
returning the probabilities of birth p[n]:
*)

Pest[n_, p_Function] := Module[{Pest, fi, f, q},
If[p[n] <= 0.5, (*Exclude the trivial case where establishment is impossible*)
Pest = 0,
(*Define vector components of probability generating function (PGF)*)
fi[i_Integer, x_List] =
1 - p[i] (1 - Sum[PDF[HypergeometricDistribution[n, 2 i, 2 n], l] * Indexed[x, l + 1] *
Indexed[x, 2 i - l + 1], {l, Max[0, 2 i - n], Min[n, 2 i]}]);
(*Define multitype probability generating function*)
f[x_List] = Table[Apply[fi, {i, x}], {i, 0, n}];
(*Calculation of the fixed point by numerically iterating the PGF*)
q = FixedPoint[f, ConstantArray[0, n + 1]];
(*Calculate the establishment
probability from the component Subscript[q, 1]=q[[2]]
since q={Subscript[q, 0],Subscript[q, 1],...}*)
Pest = 1 - q[[2]];
];
(*Return the establishment probability*)
Pest
]

(*Define a function for the de-novo rescue probability given the PCN n,
establishment
probability Pest,
exclude the trivial case  $\lambda_0 \geq \mu$  where wild-type population does not
decline*)
Pres1[n_, Pest_,  $\lambda_0$ _,  $\mu_0$ _] := 1 - Exp[-N0u *  $\lambda_0$  / ( $\mu_0$  -  $\lambda_0$ ) * n * Pest];
Pres[n_, type_, cout_] :=
{ 1. ,  $\lambda[n, type, cout][0] \geq \mu_1[n, type]$ 
Pres1[n, Pest[n, p[n, type, cout]], True
 $\lambda[n, type, cout][0], \mu_1[n, type]$  }
```

## Calculate rescue probabilities

for the three types

Panel C – *Relative* (Relative number of mutated plasmids determine the degradation rate),

Panel E – *Absolute* (Absolute number of mutated plasmids determine the degradation rate),

Panel F – *AbsoluteCost* (like Absolute and fitness is deteriorating with

increasing PCN  $n$ )  
 for range of antibiotic concentrations  $c_{out}$  (columns)  
 and for various plasmid copy numbers  $n$  (rows)

In[1603]:=

```
(*Helper function to calculate data for ranges*)
CalculateRescueProbabilities[type_] :=
  Table[{cout, Pres[n, type, cout]}, {n, nRange}, {cout, coutRange}]
(*Helper function to show result table as a grid*)
GridData[t_] :=
  Grid[MapThread[Prepend, {Prepend[t[[All, 1 ;; -1 ;; Ceiling[Length[t[[1]]]/10], 2]]
    , coutRange[1 ;; -1 ;; Ceiling[Length[t[[1]]]/10]]], Prepend[nRange, ""]}]
(*Helper function fr plots*)
ListPlotData[t_, type_] := ListPlot[t, PlotLabel -> type,
  FrameLabel -> {"Antibiotic concentration  $c_{out}$ ", "Rescue probability"},
  PlotTheme -> "Scientific", PlotRange -> {0, 1},
  PlotLegends -> PointLegend[nRange, LegendLabel -> "Plasmid copy \nnumber  $n$ "]]
```

In[1606]:= type="Relative - Panel C";

t=CalculateRescueProbabilities[type];

GridData[t]

ListPlotData[t,type]

|    | 1. | 1.16     | 1.32     | 1.48     | 1.64     | 1.8      | 1.96     | 2.12     | 2.28    |
|----|----|----------|----------|----------|----------|----------|----------|----------|---------|
| 1  | 1. | 0.373062 | 0.270002 | 0.235751 | 0.21044  | 0.178014 | 0.131999 | 0.07289  | 0.00800 |
|    |    |          |          |          |          |          |          | 73       | 886     |
| 2  | 1. | 0.451719 | 0.30926  | 0.241318 | 0.190601 | 0.146823 | 0.102938 | 0.055315 | 0.00601 |
|    |    |          |          |          |          |          |          |          | 854     |
| 5  | 1. | 0.524793 | 0.292558 | 0.185786 | 0.123721 | 0.08245  | 0.05143  | 0.02548  | 0.00264 |
|    |    |          |          |          |          | 21       | 08       | 62       | 904     |
| 10 | 1. | 0.52549  | 0.235672 | 0.121536 | 0.06742  | 0.03821  | 0.02072  | 0.00917  | 0.00087 |
|    |    |          |          |          | 37       | 58       | 79       | 493      | 6751    |

Out[1608]=

Out[1609]=

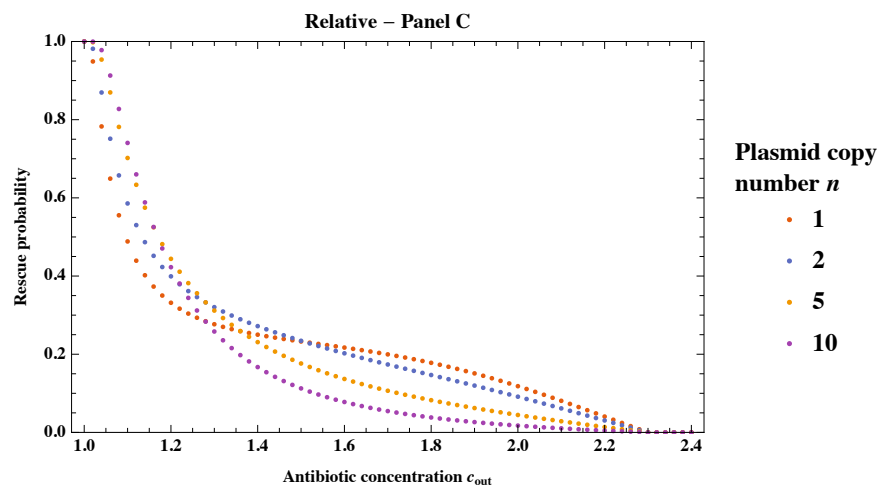

```
In[1610]:= type="Absolute - Panel E";
```

```
t=CalculateRescueProbabilities[type];
```

```
GridData[t]
```

```
ListPlotData[t,type]
```

```

      1.    1.16    1.32    1.48    1.64    1.8    1.96    2.12    2.28
1  1.  0.05402\    0.    0.    0.    0.    0.    0.    0.
      46
2  1.  0.238689  0.05473\    0.    0.    0.    0.    0.    0.
      35
5  1.  0.455145  0.225918  0.128467  0.07368\  0.03608\  0.00650\    0.    0.
      91    27    19
10 1.  0.671943  0.378353  0.23303  0.152042  0.102874  0.07115  0.04970\  0.03462\
      87    07

```

```
Out[1612]=
```

```
Out[1613]=
```

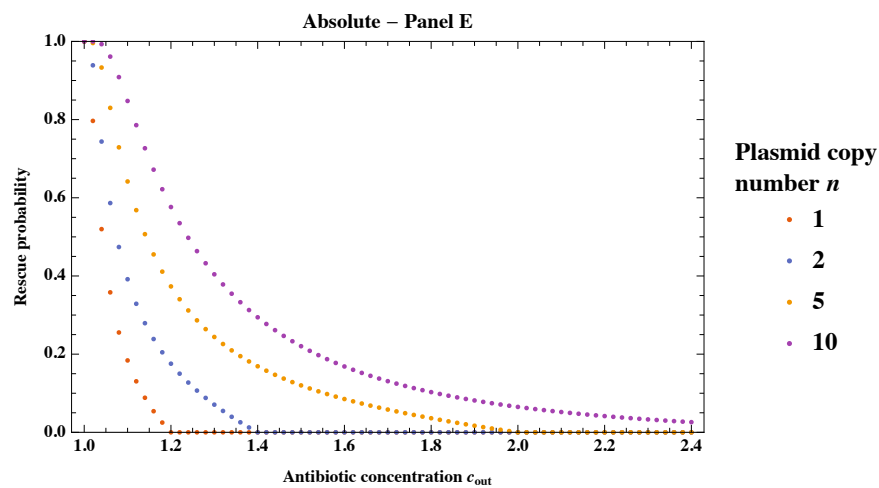

```
In[1614]:= type="AbsoluteCost - Panel F";
```

```
t=CalculateRescueProbabilities[type];
```

```
GridData[t]
```

```
ListPlotData[t,type]
```

```
Out[1616]=
```

|    | 1.      | 1.16    | 1.32    | 1.48    | 1.64    | 1.8     | 1.96    | 2.12    | 2.28    |
|----|---------|---------|---------|---------|---------|---------|---------|---------|---------|
| 1  | 0.9763\ | 0.0380\ | 0.      | 0.      | 0.      | 0.      | 0.      | 0.      | 0.      |
|    | 48      | 724     |         |         |         |         |         |         |         |
| 2  | 0.9531\ | 0.1910\ | 0.0352\ | 0.      | 0.      | 0.      | 0.      | 0.      | 0.      |
|    | 65      | 71      | 53      |         |         |         |         |         |         |
| 5  | 0.8786\ | 0.2923\ | 0.1418\ | 0.0769\ | 0.0404\ | 0.0152\ | 0.      | 0.      | 0.      |
|    | 72      | 89      | 54      | 704     | 814     | 813     |         |         |         |
| 10 | 0.7791\ | 0.31226 | 0.15717 | 0.0885\ | 0.0533\ | 0.0334\ | 0.0214\ | 0.0137\ | 0.0086\ |
|    | 25      |         |         | 821     | 444     | 503     | 323     | 749     | 4951    |

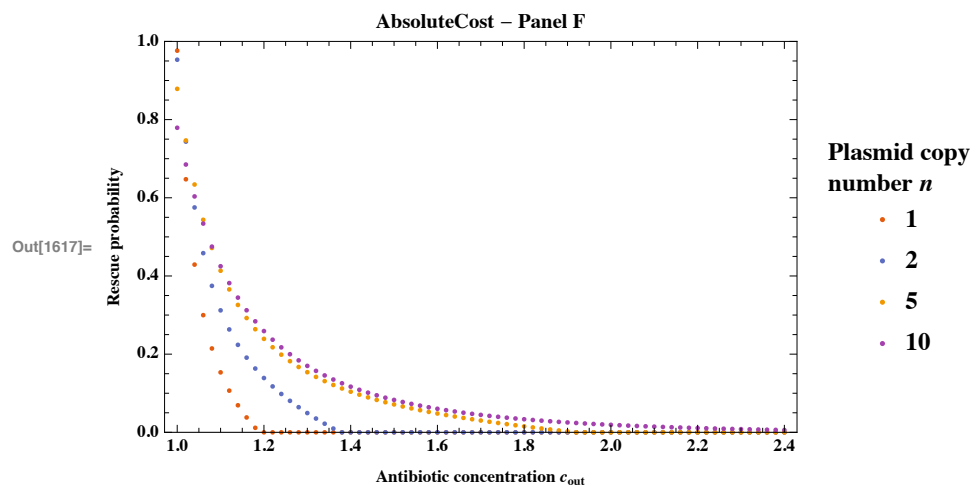

Supplement: Supplementary file 6 [file 1]
