# Supplementary material
Source: publisher figshare collection journal article supplement (https://gsajournals.figshare.com/articles/dataset/_/12357731)

### (i) Dominant mutation

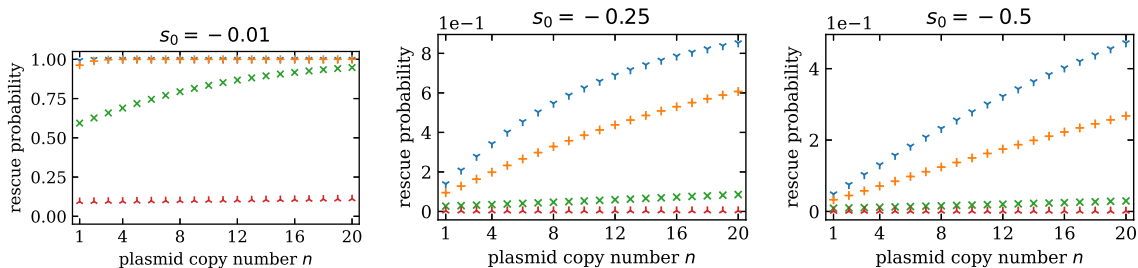

### (ii) Recessive mutation

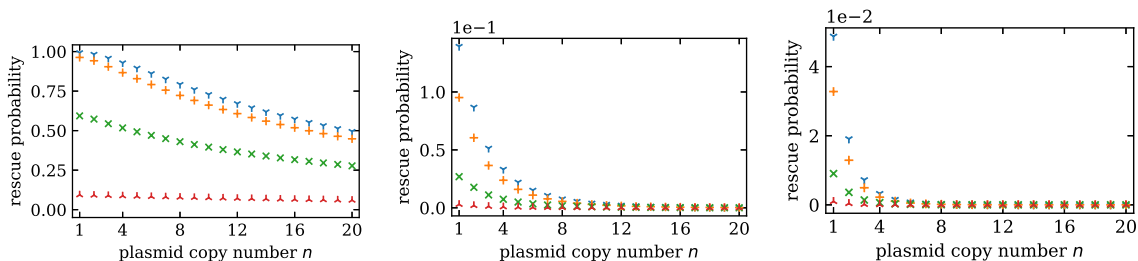

### (iii) Mutation of intermediate dominance

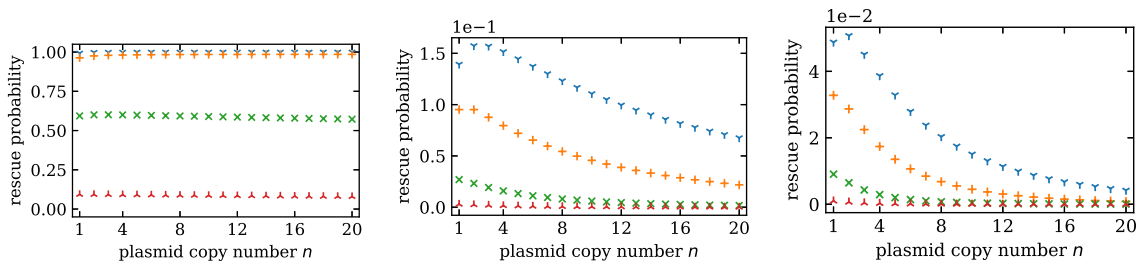

### (iv) Gene dosage effect

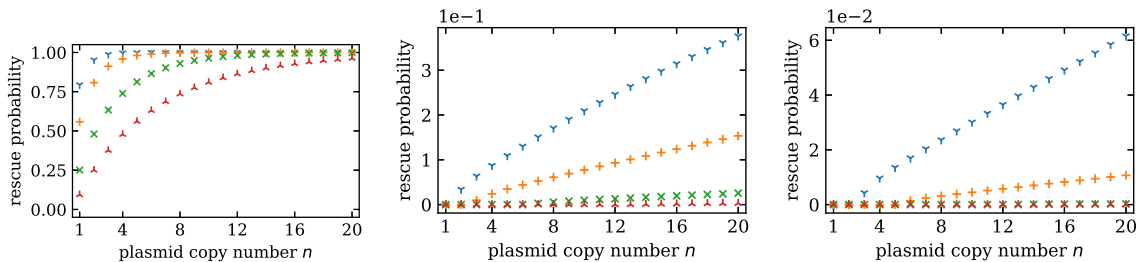

Supplement: Supplementary file 12 [file 1]
