# Supplementary material
Source: publisher figshare collection journal article supplement (https://gsajournals.figshare.com/articles/dataset/_/12357731)

(i) Dominant mutation

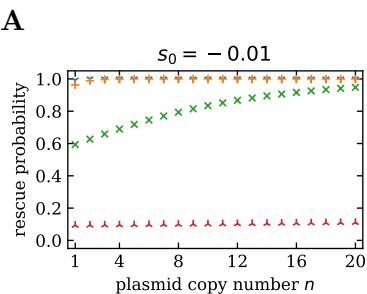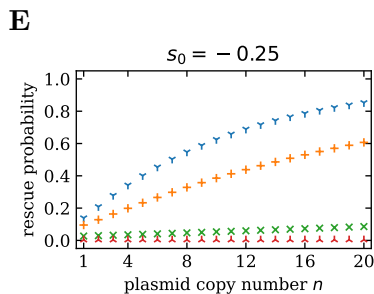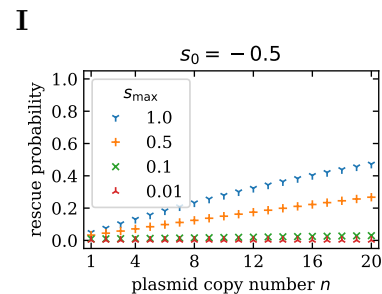

(ii) Recessive mutation

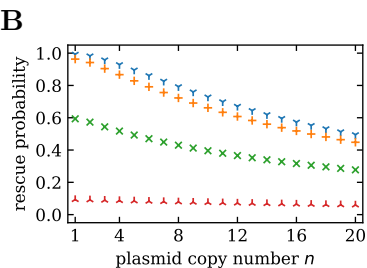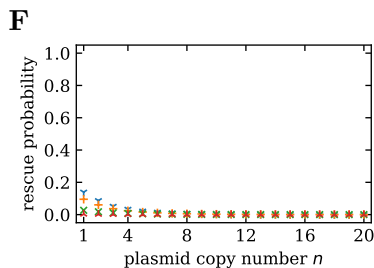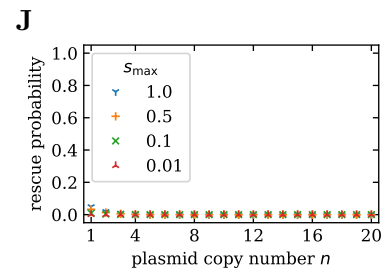

(iii) Mutation of intermediate dominance

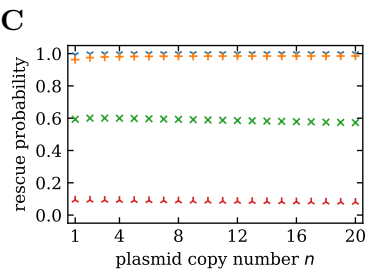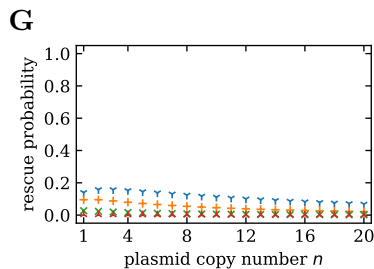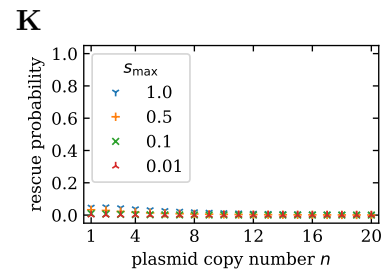

(iv) Gene dosage effect

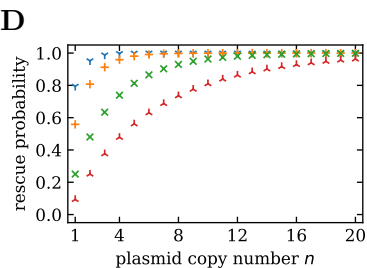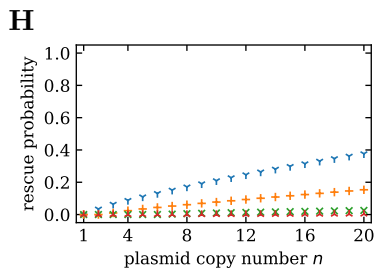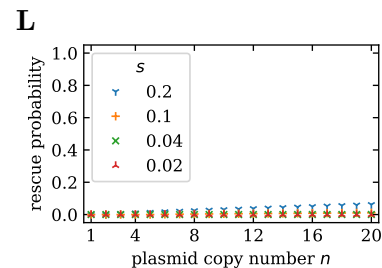

Supplement: Supplementary file 14 [file 1]
