# Supplementary material
Source: publisher figshare collection journal article supplement (https://gsajournals.figshare.com/articles/dataset/_/12357731)

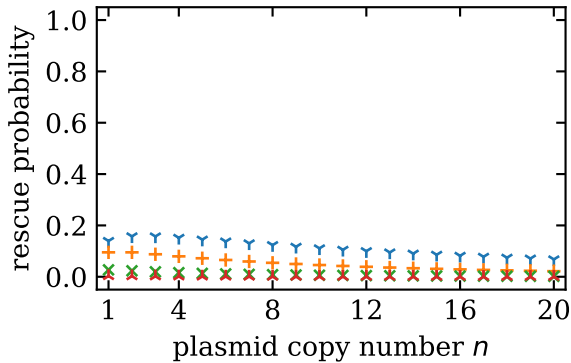

Supplement: Supplementary file 2 [file 1]

## Without backmutation

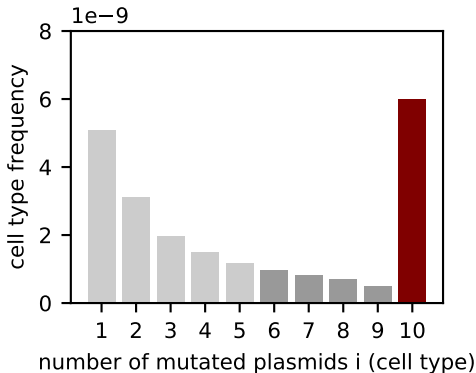

Supplement: Supplementary file 3 [file 1]

$$s_0 = -0.5$$

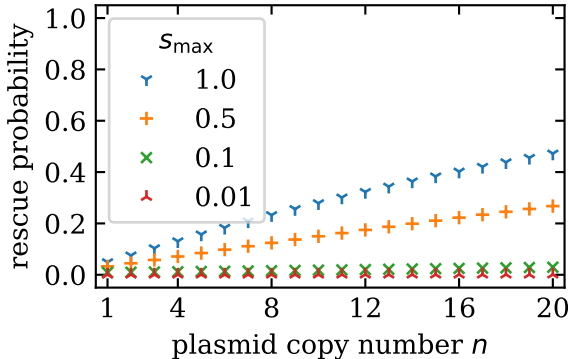

Supplement: Supplementary file 4 [file 1]

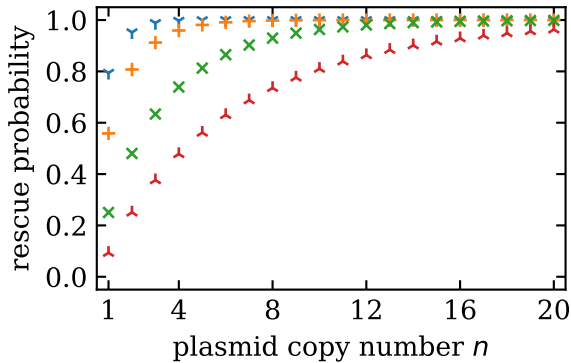

Supplement: Supplementary file 5 [file 1]

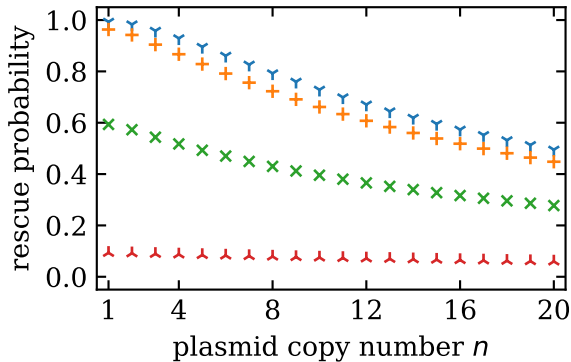

Supplement: Supplementary file 7 [file 1]

Distribution of cell type frequencies under SGV  
with backmutation

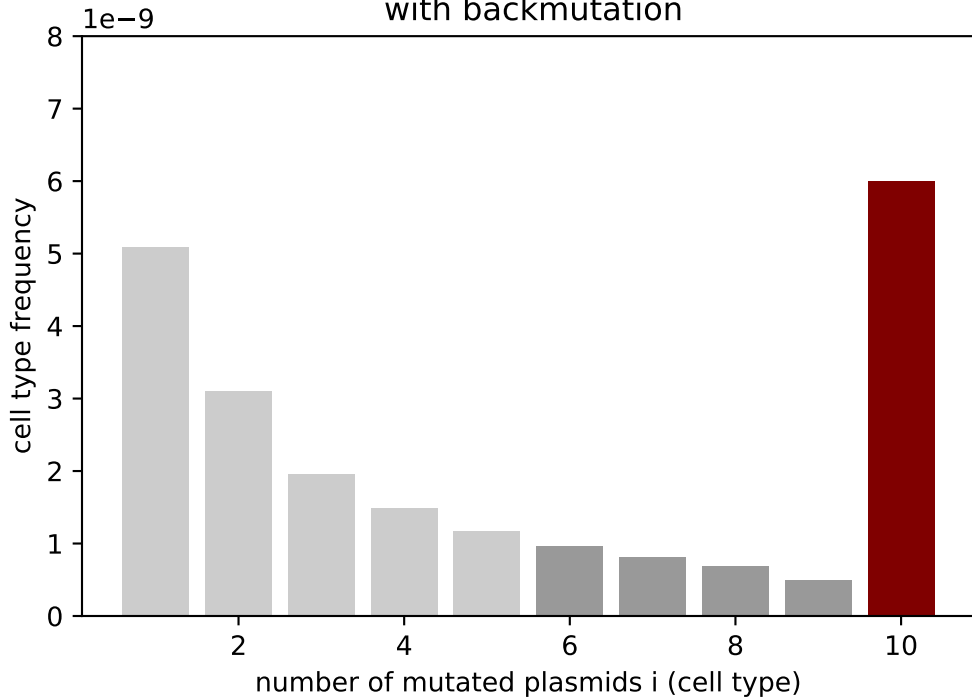

Supplement: Supplementary file 8 [file 1]

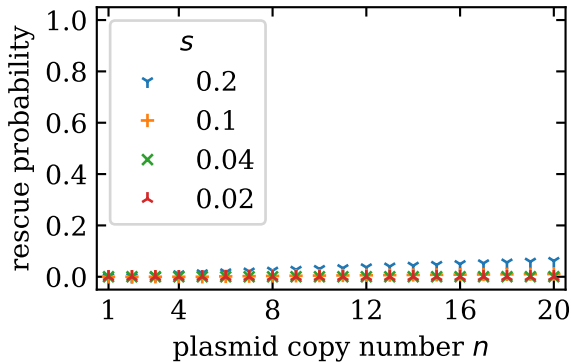

Supplement: Supplementary file 9 [file 1]

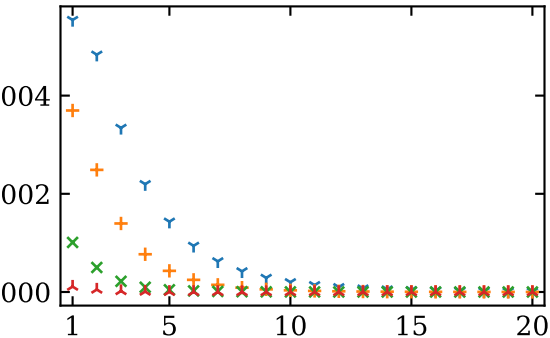

Supplement: Supplementary file 10 [file 1]

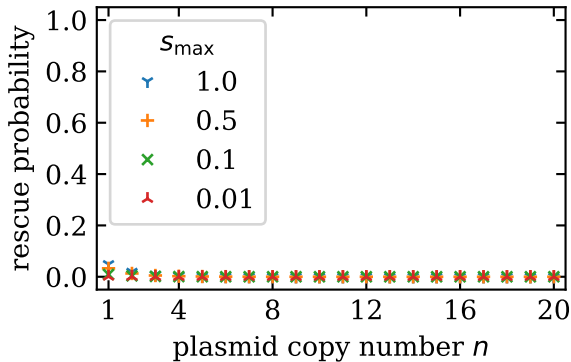

Supplement: Supplementary file 11 [file 1]

Distribution of cell type frequencies under SGV  
without backmutation

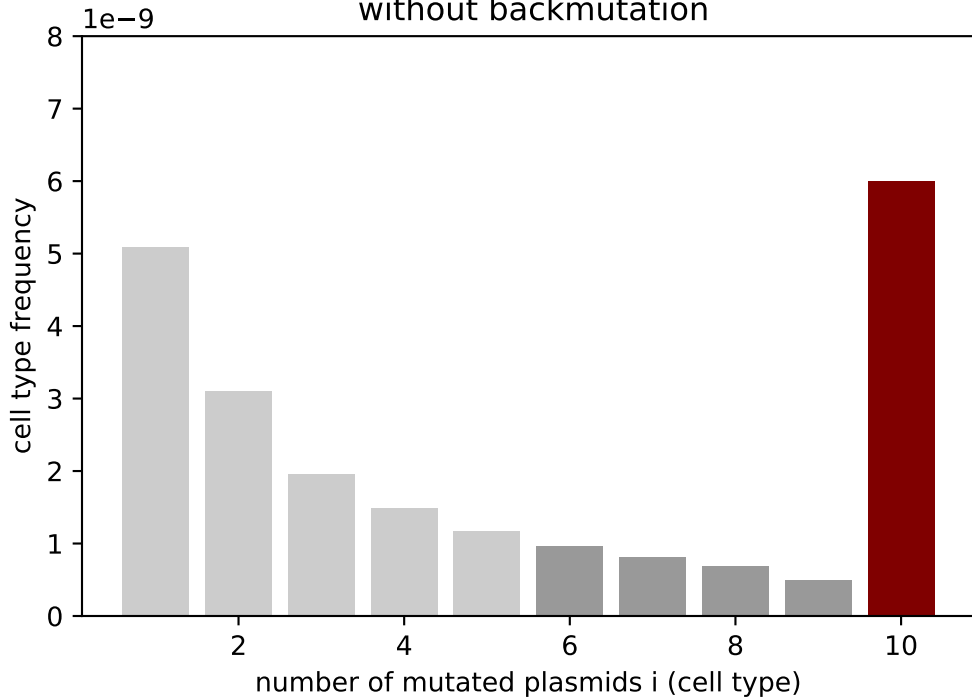

Supplement: Supplementary file 13 [file 1]

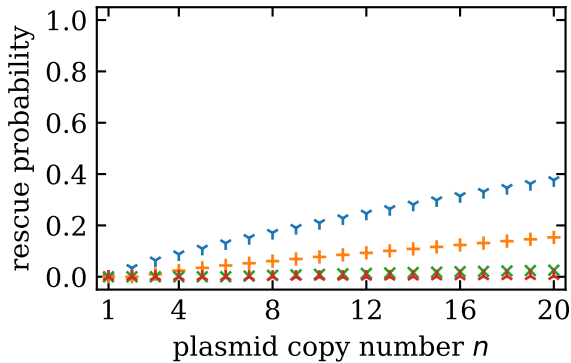

Supplement: Supplementary file 16 [file 1]

$$s_0 = -0.01$$

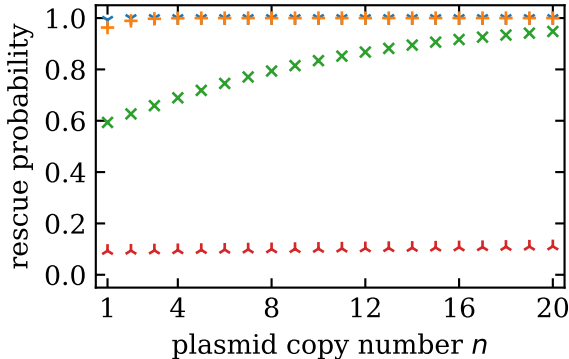

Supplement: Supplementary file 17 [file 1]

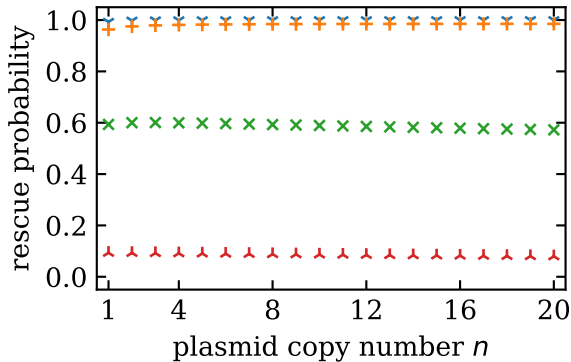

Supplement: Supplementary file 18 [file 1]

## With backmutation

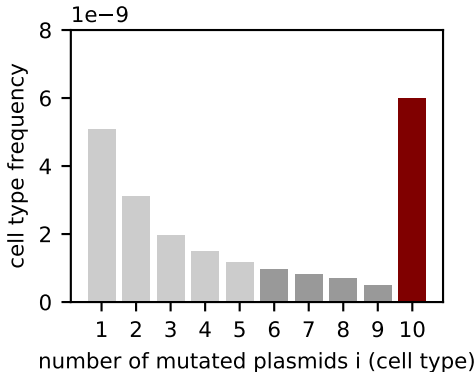

Supplement: Supplementary file 20 [file 1]

$$s_0 = -0.25$$

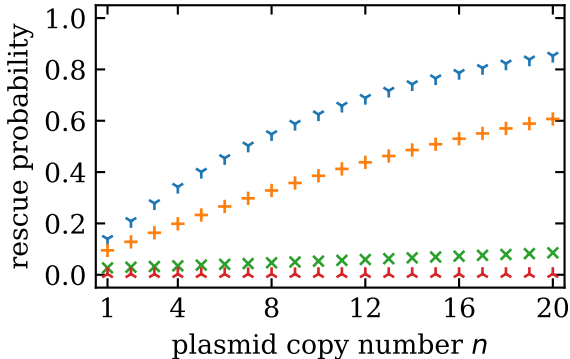

Supplement: Supplementary file 21 [file 1]

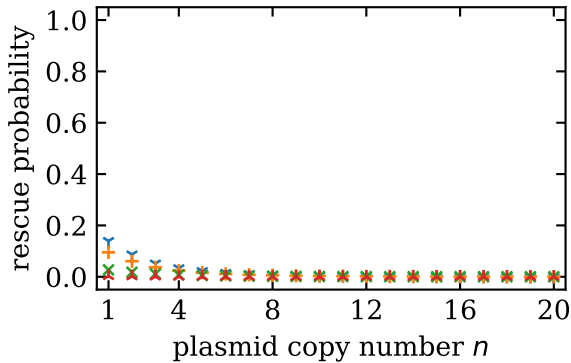

Supplement: Supplementary file 22 [file 1]

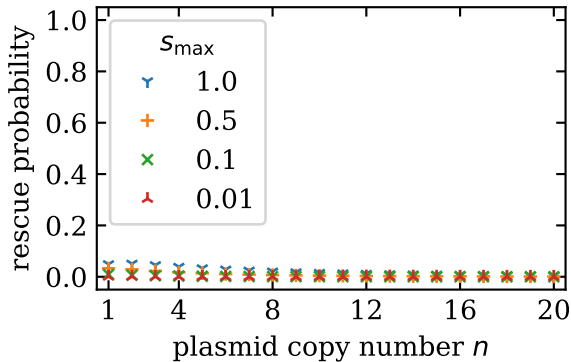

Supplement: Supplementary file 23 [file 1]
